# Supplementary material for: Racial, Ethnic, and Gender Disparities in Health Care Access and Use Among U.S. Adults With Serious Psychological Distress
Source: Atypon-hosted journal article supplement (doi:10.1176/appi.ps.201700221), 2018-02-01
Supplement: appi.ps.201700221.ds001.pdf [file appi.ps.201700221.ds001.pdf]

APPENDIX

Table 1. Sociodemographic Variables, Type of Health Coverage, Survey Year, Utilization and Functional Indicators by Race/Ethnicity in Adults with Serious Psychological Distress aged 18 to 64 years in the United States, NHIS: 2006-2015.

|                                               | Hispanic                                                 |        |                  | Non-Hispanic white |       |                  | Non-Hispanic black |       |                  | Other Race/ethnicity |       |                  | Rao-Scott<br>Chi squared<br>P-value |
|-----------------------------------------------|----------------------------------------------------------|--------|------------------|--------------------|-------|------------------|--------------------|-------|------------------|----------------------|-------|------------------|-------------------------------------|
|                                               | Unweighted N                                             |        | Weighted Percent | Unweighted N       |       | Weighted Percent | Unweighted N       |       | Weighted Percent | Unweighted N         |       | Weighted Percent |                                     |
| <i>Overall</i>                                | 1,819                                                    |        | 16.2%            | 5,121              |       | 66.8%            | 1,592              |       | 14.4%            | 256                  |       | 2.4%             | <.0001                              |
| <i>Characteristic</i>                         | <i>Unweighted N Weighted Percent Confidence Interval</i> |        |                  |                    |       |                  |                    |       |                  |                      |       |                  |                                     |
| <i>Age-Group in years</i>                     |                                                          |        |                  |                    |       |                  |                    |       |                  |                      |       |                  |                                     |
| 18-44                                         | 995                                                      | 58.7 % | 55.4%-<br>62.0%  | 2,200              | 46.7% | 44.8%-<br>48.5%  | 803                | 56.8% | 53.6%-<br>60.1%  | 144                  | 54.1% | 45.3%-<br>62.9%  | <.0001                              |
| 45-64                                         | 824                                                      | 41.2%  | 37.9%-<br>44.5%  | 2,921              | 53.2% | 51.4%-<br>55.1%  | 789                | 43.1% | 39.8%-<br>46.3%  | 112                  | 45.8% | 37.0%-<br>54.6%  |                                     |
| <i>Education Level</i>                        |                                                          |        |                  |                    |       |                  |                    |       |                  |                      |       |                  |                                     |
| No high school diploma                        | 755                                                      | 44.2%  | 41.0%-<br>47.4%  | 975                | 21.6% | 20.2%-<br>23.1%  | 443                | 28.2% | 24.6%-<br>31.9%  | 47                   | 17.1% | 11.3%-<br>23.0%  | <.0001                              |
| High school graduate                          | 394                                                      | 24.7%  | 22.2%-<br>27.3%  | 1,559              | 34.7% | 32.8%-<br>36.6%  | 452                | 33.2% | 29.9%-<br>36.4%  | 48                   | 22.6% | 14.8%-<br>30.4%  |                                     |
| Some college                                  | 366                                                      | 23.2%  | 20.3%-<br>26.2%  | 1,582              | 32.5% | 30.7%-<br>34.2%  | 465                | 32.0% | 28.6%-<br>35.5%  | 56                   | 21.7% | 15.0%-<br>28.5%  |                                     |
| College degree and more                       | 113                                                      | 7.7%   | 6.1%-<br>9.2%    | 562                | 11.0% | 9.8%-<br>12.1%   | 81                 | 6.4%  | 4.7%-<br>8.0%    | 79                   | 38.3% | 29.5%-<br>47.1%  |                                     |
| <i>Number of Health Conditions</i>            |                                                          |        |                  |                    |       |                  |                    |       |                  |                      |       |                  |                                     |
| 0                                             | 845                                                      | 50.0%  | 47.0%-<br>53.1%  | 1,916              | 40.5% | 38.7%-<br>42.3%  | 568                | 41.5% | 38.3%-<br>44.6%  | 151                  | 57.9% | 49.7%-<br>66.1%  | <.0001                              |
| 1                                             | 478                                                      | 25.1%  | 22.4%-<br>27.8%  | 1,426              | 27.7% | 26.2%-<br>29.2%  | 462                | 26.3% | 18.9%-<br>36.6%  | 65                   | 27.8% | 18.9%-<br>36.6%  |                                     |
| 2 or more                                     | 476                                                      | 24.7%  | 22.1%-<br>27.4%  | 1,619              | 31.6% | 30.0%-<br>33.2%  | 546                | 32.1% | 29.1%-<br>35.1%  | 37                   | 14.2% | 8.1%-<br>20.1%   |                                     |
| <i>Poverty Index Ratio*</i>                   |                                                          |        |                  |                    |       |                  |                    |       |                  |                      |       |                  |                                     |
| Less than 100% of the<br>Federal Poverty Line | N/A                                                      | 39.4%  | 36.2%-<br>42.6%  | N/A                | 29.6% | 28.0%-<br>31.2%  | N/A                | 48.3% | 44.9%-<br>51.8%  | N/A                  | 26.5% | 20.5%-<br>32.6%  | <.0001                              |
| 100 to 199% of the<br>Federal Poverty Line    | N/A                                                      | 31.3%  | 28.7%-<br>34.0%  | N/A                | 27.2% | 25.7%-<br>28.7%  | N/A                | 24.2% | 21.5%-<br>26.8%  | N/A                  | 19.6% | 13.5%-<br>25.8%  |                                     |
| 200 to 399% of the<br>Federal Poverty Line    | N/A                                                      | 19.6%  | 17.2%-<br>21.9%) | N/A                | 25.9% | 24.3%-<br>27.6%  | N/A                | 19.0% | 16.2%-<br>21.8%  | N/A                  | 21.1% | 14.9%-<br>27.3%  |                                     |
| 400% or More of the                           | N/A                                                      | 9.5%   | 7.5%-            | N/A                | 17.0% | 15.4%-           | N/A                | 8.3%  | 6.4%-            | N/A                  | 32.6% | 24.2%-           |                                     |

|                                                                  |     |       |             |       |       |             |     |       |             |     |       |             |                 |
|------------------------------------------------------------------|-----|-------|-------------|-------|-------|-------------|-----|-------|-------------|-----|-------|-------------|-----------------|
| Federal Poverty Line                                             |     |       | 11.4%)      |       |       | 18.6%       |     |       | 10.3%       |     |       | 41.0%       |                 |
| <i>Healthcare Type</i>                                           |     |       |             |       |       |             |     |       |             |     |       |             |                 |
| No coverage                                                      | 625 | 40.7% | 37.5%-44.0% | 1,236 | 29.0% | 27.2%-30.7% | 445 | 34.3% | 30.9%-37.8% | 68  | 35.0% | 25.8%-44.3% | <.0001          |
| Medicaid                                                         | 570 | 31.6% | 28.4%-34.8% | 1,375 | 28.1% | 26.0%-30.1% | 571 | 37.4% | 34.0%-40.8% | 53  | 18.9% | 12.1%-25.6% |                 |
| Private Insurance                                                | 379 | 27.2% | 24.3%-30.1% | 1,671 | 42.2% | 40.1%-44.3% | 232 | 26.8% | 23.7%-29.9% | 104 | 45.7% | 35.6%-55.9% |                 |
| Medicaid and Private Insurance                                   | 10  | .37%  | 24.3%-30.1% | 35    | .61%  | .35%-.87%   | 14  | 1.2%  | .43%-2.1%   | 1   | 23%   | 0%-.70%     |                 |
| <i>Region of Residence to interview</i>                          |     |       |             |       |       |             |     |       |             |     |       |             |                 |
| North East                                                       | 337 | 17.7% | 14.5%-20.9% | 787   | 14.9% | 13.4%-16.3% | 206 | 13.8% | 11.5%-16.1% | 44  | 18.8% | 12.7%-24.9% | <.0001          |
| Midwest                                                          | 145 | 8.9%  | 6.6%-11.3%  | 1,324 | 28.1% | 25.8%-30.3% | 299 | 20.2% | 17.2%-23.1% | 37  | 15.5% | 10.0%-21.1% |                 |
| South                                                            | 615 | 33.8% | 30.5%-37.1% | 1,894 | 38.2% | 35.8%-40.6% | 895 | 55.4% | 51.6%-59.1% | 57  | 22.9% | 16.4%-29.4% |                 |
| West                                                             | 722 | 39.4% | 35.6%-43.1% | 1,116 | 18.7% | 17.2%-20.1% | 192 | 10.5% | 8.0%-13.0%  | 118 | 42.6% | 34.3%-50.9% |                 |
| <i>Health Care Utilization Indicators</i>                        |     |       |             |       |       |             |     |       |             |     |       |             |                 |
| Insufficient money for medications                               | 369 | 18.7% | 16.5%-20.8% | 1,342 | 26.0% | 24.5%-27.5% | 360 | 23.7% | 20.8%-26.6% | 39  | 13.5% | 8.9%-18.1%  | <.0001          |
| Insufficient money for mental health counseling                  | 369 | 18.7% | 16.5%-20.8% | 1,342 | 26.0% | 24.5%-27.5% | 360 | 23.7% | 20.8%-26.6% | 39  | 13.5% | 8.9%-18.1%  | <.0001          |
| Seen or talked to a mental health provider in the last 12 months | 574 | 30.0% | 27.2%-32.7% | 2,205 | 41.5% | 39.7%-43.4% | 573 | 34.4% | 31.5%-37.3% | 66  | 22.6% | 15.7%-29.5% | <.0001          |
| Delay in care                                                    | 558 | 28.3% | 25.5%-31.0% | 2,088 | 37.0% | 35.2%-38.9% | 542 | 30.5% | 27.5%-33.4% | 68  | 21.5% | 15.7%-27.3% | <.0001          |
| Insufficient money for healthcare                                | 547 | 27.7% | 25.0%-30.3% | 1,839 | 32.7% | 30.9%-34.4% | 574 | 32.5% | 29.5%-35.5% | 53  | 17.6% | 11.9%-23.3% | <.0001          |
| Visited a doctor ten times or more in past 12 months             | 606 | 30.0% | 27.2%-32.7% | 2,134 | 39.2% | 37.5%-40.0% | 614 | 34.7% | 31.8%-37.6% | 61  | 22.3% | 15.3%-29.3% | <.0001          |
| Changed usual place of care                                      | 141 | 8.8%  | 6.9%-10.6%  | 642   | 12.5% | 11.3%-13.7% | 177 | 10.3% | 8.3%-12.3%  | 26  | 10.1% | 5.3%-14.9%  | <.01            |
| Changed usual place of care due to insurance                     | 67  | 4.6%  | 3.1%-6.1%   | 194   | 3.7%  | 3.1%-4.3%   | 70  | 4.3%  | 2.9%-5.6%   | 13  | 6.7%  | 2.3%-11.0%  | Not significant |

Table 2. Associations between Healthcare Utilization and Rec/ethnicity Adjusting for Number of Chronic Health Conditions and Sociodemographic Characteristics from Multivariate Regression Models Among Adults with Serious Psychological Distress Age 18 to 64 Years of Age: NHIS 2006-2015.

|                                                    | Insufficient Money for Medications |         | Delay in Care |         | Insufficient Money for Healthcare |         | Visited a doctor More Than Ten Times |         | Changed Usual Place of Care |         | Changed Usual Place of Care Due to Insurance |         | Having Seen a Mental health Provider in the last 12 months |         | Insufficient Money for Mental Health Care |         |
|----------------------------------------------------|------------------------------------|---------|---------------|---------|-----------------------------------|---------|--------------------------------------|---------|-----------------------------|---------|----------------------------------------------|---------|------------------------------------------------------------|---------|-------------------------------------------|---------|
| <i>Adjusted Odds Ratios (Confidence Intervals)</i> |                                    |         |               |         |                                   |         |                                      |         |                             |         |                                              |         |                                                            |         |                                           |         |
| Female (Reference: Male)                           | 1.3**<br>*                         | 1.1-1.6 | 1.2*          | 1.0-1.4 | 1.2*                              | 1.0-1.4 | 1.2*                                 | 1.0-1.4 | 1.2*                        | 1.0-1.5 | 1.1                                          | .81-1.5 | 1.1                                                        | .97-1.3 | 1.3***                                    | 1.1-1.6 |
| Hispanic (Reference: non-Hispanic black)           | .61**                              | .48-.78 | .74*          | .58-.94 | .67*                              | .53-.85 | .85                                  | .68-1.0 | .82                         | .58-1.1 | .99                                          | .55-1.7 | .84                                                        | .68-1.0 | .61***                                    | .48-.78 |
| non-Hispanic white                                 | 1.2*                               | 1.0-1.5 | 1.5***        | 1.2-1.8 | 1.1                               | .95-1.3 | 1.1                                  | .95-1.3 | 1.1                         | .90-1.5 | .83                                          | .54-1.2 | 1.3*                                                       | 1.1-1.6 | 1.2*                                      | 1.0-1.5 |
| Other Race/Ethnicities                             | .46*                               | .27-.78 | .59*          | .38-.93 | .45*                              | .27-.73 | .62                                  | .36-1.0 | .95                         | .51-1.5 | 1.7                                          | .75-3.9 | .59*                                                       | .36-.96 | .46*                                      | .27-.78 |
| 1 Health Condition (Reference: 0 conditions)       | 1.2**                              | 1.0-1.5 | 1.3**         | 1.1-1.6 | 1.4**                             | 1.1-1.6 | 1.5**<br>*                           | 1.2-1.7 | 1.1                         | .87-1.4 | 1.0                                          | .69-1.4 | 1.1                                                        | .95-1.3 | 1.2**                                     | .10-1.5 |
| 2 or more Health Conditions                        | 1.5**<br>*                         | 1.2-1.8 | 1.4**         | 1.1-1.7 | 1.5*                              | 1.2-1.8 | 2.7**<br>*                           | 2.3-3.3 | 1.2                         | .99-1.6 | 1.1                                          | .76-1.6 | 1.1                                                        | .95-1.2 | 1.5***                                    | 1.2-1.8 |
| 45 to 64 Years (reference: 18-44 years)            | .71**<br>*                         | .60-.84 | 1.2***        | 1.1-1.4 | 1.2*                              | 1.0-1.4 | 1.4**<br>*                           | 1.2-1.7 | .88                         | .70-1.1 | 1.0                                          | .78-1.4 | .82*                                                       | .71-.96 | .71***                                    | .60-.84 |

|                                                                        |            |         |        |         |        |         |            |         |      |              |     |         |        |             |        |            |
|------------------------------------------------------------------------|------------|---------|--------|---------|--------|---------|------------|---------|------|--------------|-----|---------|--------|-------------|--------|------------|
| PIR < 100% (reference:<br>400% or more of the<br>Federal Poverty Line) | 2.2**      | 1.6-3.0 | 2.7*** | 2.0-3.6 | 3.1*** | 2.3-4.2 | 1.0        | .78-1.3 | .65  | .45-<br>.96* | .89 | .49-1.6 | .87    | .66-<br>1.1 | 2.2    | 1.6-3.0*** |
| 100%-199%                                                              | 1.8**<br>* | 1.3-2.4 | 2.3*** | 1.7-3.1 | 2.6*** | 1.9-3.5 | .82        | .64-1.0 | .65* | .45-<br>.96  | 1.3 | .78-2.3 | .73*   | .56-<br>.95 | 1.8**  | 1.3-2.4    |
| 200% - 399% of PIR                                                     | 2.0**<br>* | 1.5-2.7 | 2.0*** | 1.5-2.6 | 2.0*** | 1.5-2.6 | 1.0        | .81-1.3 | .74  | .52-<br>1.0  | .71 | .40-1.2 | .79    | .61-<br>1.0 | 2.0*** | 1.5-2.7    |
| No Health Coverage                                                     | 3.1**<br>* | 2.5-3.8 | 3.5*** | 2.9-4.2 | 4.3*** | 3.5-5.1 | .42**<br>* | .34-.51 | .75  | .52-<br>1.0  | 1.3 | .81-2.1 | .59*** | .48-<br>.71 | 3.1*** | 2.5-3.8    |
| Medicaid (reference:<br>Private Insurance)                             | .78*       | .62-.99 | .43*** | .35-.54 | .54*** | .43-.68 | 1.4**      | 1.1-1.7 | .74* | .55-<br>.98  | 1.0 | .63-1.6 | 1.7*** | 1.3-<br>2.0 | .78*   | .62-.99    |
| Private Insurance and<br>Medicaid                                      | 1.0        | .43-2.4 | .67    | .28-1.5 | .76    | .31-1.8 | 1.7        | .75-3.9 | 1.0  | .77-<br>1.3  | 1.9 | .53-7.4 | 1.9*   | 1.0-<br>3.7 | 1.0    | .43-2.4    |
| Midwest(reference:<br>Northeast)                                       | 1.2        | .93-1.5 | 1.2    | .98-1.7 | 1.2    | .96-1.6 | .80        | .64-1.0 | 1.1  | .82-<br>1.6  | 1.4 | .77-2.7 | .93    | .75-<br>1.1 | 1.2    | .93-1.5    |
| South                                                                  | 1.0        | .80-1.3 | 1.3*   | 1.0-1.7 | 1.2    | .93-1.5 | .81        | .66-1.0 | 1.0  | .80-         | 1.1 | .66-2.0 | .65*** | .53-        | 1.0    | .0-1.3     |

|                                  |       |         |       |         |      |         |      |         |     |         |     |         |     |         |     |         |
|----------------------------------|-------|---------|-------|---------|------|---------|------|---------|-----|---------|-----|---------|-----|---------|-----|---------|
|                                  |       |         |       |         |      |         |      |         |     | 1.4     |     |         |     | .78     |     |         |
| West                             | 1.5** | 1.1-2.0 | 1.4** | 1.1-1.9 | 1.3* | 1.0-1.7 | .88  | .70-1.1 | 1.1 | .81-1.5 | 1.2 | .67-2.2 | .84 | .69-1.0 | 1.5 | 1.1-2.0 |
| Survey Year<br>(reference: 2006) | .97   | .95-1.0 | .98   | .96-1.0 | .97  | .95-1.0 | .96* | .94-99  | 1.0 | .98-1.0 | 1.0 | .97-1.0 | .98 | .96-1.0 | .97 | .95-1.0 |

<sup>a</sup> The reference level for utilization and functional indicators was their absence.

<sup>b</sup> Independent variables included Gender, Race/Ethnicity, Gender, Number of Chronic Health Conditions, Poverty Index Ratio, Region of residence at the time of interview and Survey Year.

\*P≤.05

\*\*P <.001

\*\*\*P <.0001
